# Supplementary material for: Omni-direction PERC solar cells harnessing periodic locally focused light incident through patterned PDMS encapsulation
Source: Royal Society of Chemistry journal article supplement (doi:10.1039/d0ra00439a), 2020-01-01
Supplement: d0ra00439a1.pdf [file d0ra00439a1.pdf]

# Omni-direction PERC Solar Cells Harnessing Periodic Locally Focused Light Incident Through Patterned PDMS Encapsulation

Yeon Hyang Sim<sup>1,2</sup>, Min Ju Yun<sup>1</sup>, Dong Y. Lee<sup>1</sup> and Seung I. Cha<sup>\*1,2</sup>,

1. Energy Conversion Research Center, Electrical Materials Research Division, Korea  
Electrotechnology Research Institute

2. Department of Electro-functionality Materials Engineering, University of Science and  
Technology

## Supporting Information

**Table S1.** Performances of PERC solar cells with difference local focusing condition calculated by PC2D.

|                                                 | <b>uniform</b> | <b>center concentration</b> | <b>left concentration</b> | <b>by grid</b> | <b>two points</b> |
|-------------------------------------------------|----------------|-----------------------------|---------------------------|----------------|-------------------|
| <b>V<sub>mpp</sub></b><br>(V)                   | 0.55           | 0.548                       | 0.55                      | 0.554          | 0.551             |
| <b>V<sub>oc</sub></b><br>(V)                    | 0.654          | 0.654                       | 0.655                     | 0.657          | 0.656             |
| <b>J<sub>sc</sub></b><br>(mA/cm <sup>2</sup> )  | 39.6           | 40.5                        | 40.6                      | 40.6           | 40.5              |
| <b>FF</b>                                       | 0.804          | 0.802                       | 0.803                     | 0.804          | 0.803             |
| <b>P<sub>max</sub></b><br>(mW/cm <sup>2</sup> ) | 20.8           | 21.2                        | 21.4                      | 21.4           | 21.3              |

**One pattern between two grids**

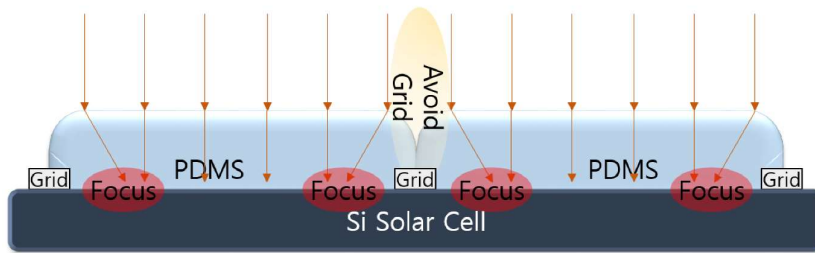

**Two patterns between two grids**

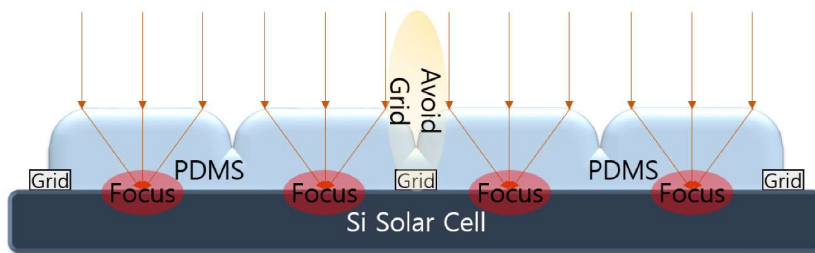

**Figure S1.** Schematic of the full devise with PDMS encapsulation.

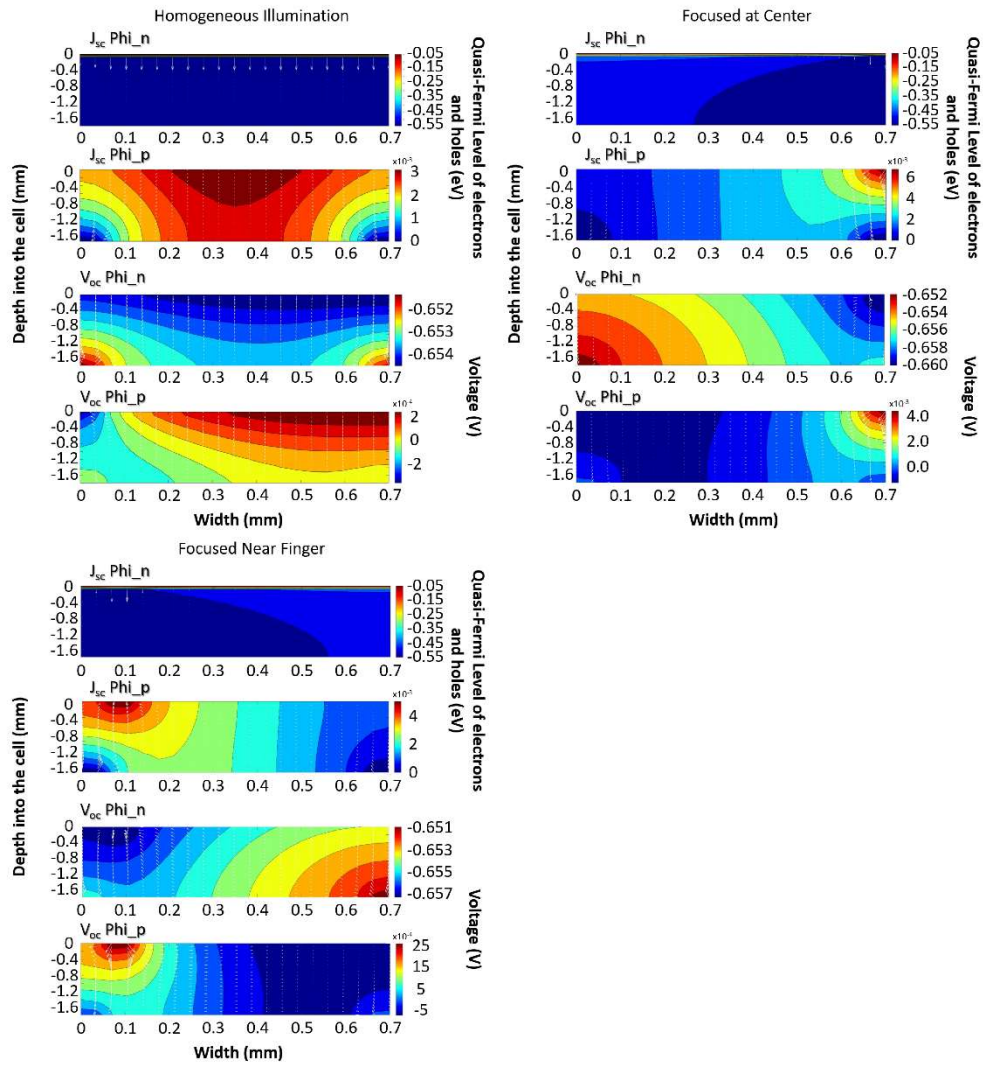

**Figure S2.** PC3D simulated results for quasi-Fermi level of electrons and holes under various local focusing condition at short circuit condition and open voltage condition.

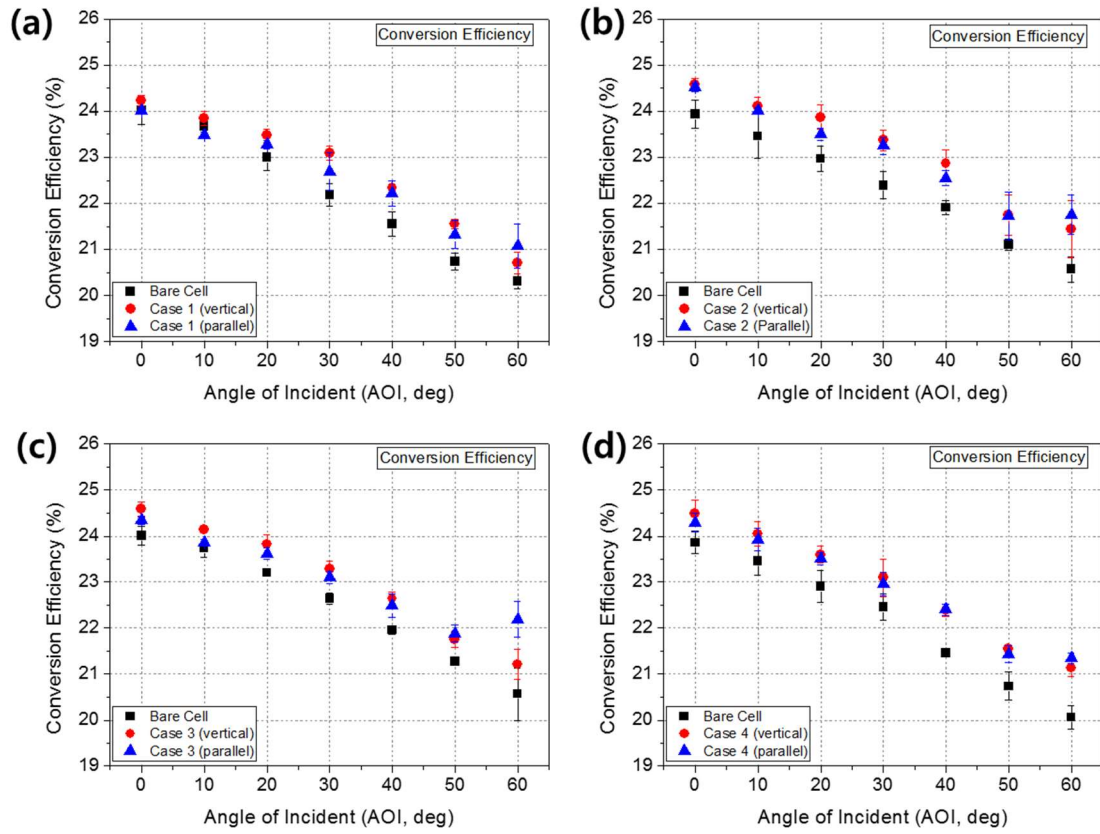

**Figure S3.** The variation of energy conversion efficiency according to AOI for (a) Case 1, (b) Case 2, (c) Case 3 and (d) Case 4 geometry introduced PDMS encapsulated PERC solar cells.
